# Supplementary material for: Advection-Diffusion Equation with Low Wind in Stable and Unstable Conditions
Source: Research Square preprint supplement (doi:10.21203/rs.3.rs-7427612/v1), 2025-09-13
Supplement: Supplementary file 1 [file 4e45f96f092dae6714da3905.docx]

**Advection-Diffusion Equation with Low Wind in Stable and Unstable Conditions**

**Khaled S.M. Essa* and Ahmed M. Mosallem**

**Department of Mathematics and Theoretical Physics, Nuclear Research Centre, Egyptian Atomic Energy Authority (EAEA), Cairo, Egypt**

*****[mohamedksm56@yahoo.com](mailto:mohamedksm56@yahoo.com)

*****<https://orcid.org/0000-0003-1477-5475>

**Abstract**

The separation approach is used to solve the advection-diffusion equation, where the vertical eddy diffusivity and wind speed are functions of the power law of vertical height, and the horizontal eddy diffusivity is a function of the vertical distance "z," which represents the near-source diffusion in weak winds. The performance of the model was evaluated against field testing carried out in the United States at the Prairie-Grass experiment in both stable and unstable conditions. .

**Keywords:** Weak Wind; Separation Method; Stable and Unstable Conditions; Prairie-Grass Experiment.
